1 Incomplete inhibition of HIV infection results in more HIV infected  
2 lymph node cells by reducing cell death

3 Laurelle Jackson<sup>1,2#</sup>, Jessica Hunter<sup>1,2#</sup>, Sandile Cele<sup>1</sup>, Isabella Markham Ferreira<sup>1,2</sup>, Andrew  
4 Young<sup>1,3</sup>, Farina Karim<sup>1</sup>, Rajhmun Madansein<sup>4,5</sup>, Kaylesh J. Dullabh<sup>4</sup>, Chih-Yuan Chen<sup>4</sup>, Noel J.  
5 Buckels<sup>4</sup>, Yashica Ganga<sup>1</sup>, Khadija Khan<sup>1</sup>, Mikaël Boullé<sup>1</sup>, Gila Lustig<sup>1</sup>, Richard A. Neher<sup>6</sup>, and  
6 Alex Sigal<sup>1,2,7\*</sup>

7 <sup>1</sup>*Africa Health Research Institute, Durban, South Africa.* <sup>2</sup>*School of Laboratory Medicine and*  
8 *Medical Sciences, University of KwaZulu-Natal, Durban, South Africa.* <sup>3</sup>*Department of*  
9 *Neurology, Massachusetts General Hospital and Harvard Medical School, Boston, USA.*  
10 <sup>4</sup>*Department of Cardiothoracic Surgery, University of KwaZulu-Natal, Durban, South Africa.*  
11 <sup>5</sup>*Centre for the AIDS Programme of Research in South Africa, Durban, South Africa.*  
12 <sup>6</sup>*Biozentrum, University of Basel, Switzerland.* <sup>7</sup>*Max Planck Institute for Infection Biology, Berlin,*  
13 *Germany.*

14 *#These authors contributed equally to the manuscript*

15 *\*For correspondence: alex.sigal@k-rith.org or sigal@mpiib-berlin.mpg.de*

16 Running title: Incomplete inhibition of HIV increases infection.

17 Keywords: HIV induced cell death/Cell-to-cell spread/Lymph node/Virus fitness/Multiple  
18 Infection.

## 19 Abstract

20 **HIV has been reported to be cytotoxic *in vitro* and in lymph node infection models. Using**  
21 **a computational approach, we found that partial inhibition of transmission which**  
22 **involves multiple virions per cell could lead to increased numbers of live infected cells if**  
23 **the number of viral DNA copies remains above one after inhibition, as eliminating the**  
24 **surplus viral copies reduces cell death. Using a cell line, we observed increased**  
25 **numbers of live infected cells when infection was partially inhibited with the antiretroviral**  
26 **efavirenz or neutralizing antibody. We then used efavirenz at concentrations reported in**  
27 **lymph nodes to inhibit lymph node infection by partially resistant HIV mutants. We**  
28 **observed more live infected lymph node cells, but with fewer HIV DNA copies per cell,**  
29 **relative to no drug. Hence, counterintuitively, limited attenuation of HIV transmission per**  
30 **cell may increase live infected cell numbers in environments where the force of infection**  
31 **is high.**

## 32 Introduction

33 HIV infection is known to result in extensive T cell depletion in lymph node environments  
34 (Sanchez et al, 2015), where infection is most robust (Brenchley et al, 2004; Doitsh et al, 2010;  
35 Doitsh et al, 2014; Finkel et al, 1995; Galloway et al, 2015; Mattapallil et al, 2005). Depletion of  
36 HIV infectable target cells, in addition to onset of immune control, is thought to account for the  
37 decreased replication ratio of HIV from an initial peak in early infection (Bonhoeffer et al, 1997;  
38 Nowak & May, 2000; Perelson, 2002; Phillips, 1996; Quinones-Mateu & Arts, 2006; Ribeiro et  
39 al, 2010; Wodarz & Levy, 2007). This is consistent with observations that individuals are most  
40 infectious in the initial, acute stage of infection, where the target cell population is relatively  
41 intact and produces high viral loads (Hollingsworth et al, 2008; Wawer et al, 2005).

42 T cell death occurs by several mechanisms, which are either directly or indirectly mediated by  
43 HIV infection. Accumulation of incompletely reverse transcribed HIV transcripts is sensed by  
44 interferon- $\gamma$ -inducible protein 16 (Monroe et al, 2014) and leads to pyroptotic death of  
45 incompletely infected cells by initiating a cellular defence program involving the activation of  
46 caspase 1 (Doitsh et al, 2010; Doitsh et al, 2014; Galloway et al, 2015). HIV proteins Tat and  
47 Env have also been shown to lead to cell death of infected cells through CD95 mediated  
48 apoptosis following T cell activation (Banda et al, 1992; Westendorp et al, 1995a; Westendorp  
49 et al, 1995b). Using SIV infection, it has been shown that damage to lymph nodes due to

50 chronic immune activation leads an environment less conducive to T cell survival (Zeng et al,  
51 2012). Finally, double strand breaks in the host DNA caused by integration of the reverse  
52 transcribed virus results in cell death by the DNA-PK mediated activation of the p53 response  
53 (Cooper et al, 2013).

54 The lymph node environment is conducive to HIV infection due to the presence of infectable  
55 cells (Deleage et al, 2016; Embretson et al, 1993; Tenner-Racz et al, 1998), the proximity of  
56 cells to each other and lack of flow which should enable cell-to-cell HIV spread (Baxter et al,  
57 2014; Dale et al, 2011; Groot et al, 2008; GropPELLI et al, 2015; Gummuluru et al, 2002; Hubner  
58 et al, 2009; Jolly et al, 2004; Jolly et al, 2011; Munch et al, 2007; Sherer et al, 2007; Sourisseau  
59 et al, 2007; Sowinski et al, 2008), and decreased penetration of antiretroviral therapy (ART)  
60 (Fletcher et al, 2014a). Multiple infections per cell have been reported in cell-to-cell spread of  
61 HIV (Baxter et al, 2014; Boullé et al, 2016; Dang et al, 2004; Del Portillo et al, 2011; Dixit &  
62 Perelson, 2004; Duncan et al, 2013; Law et al, 2016; Reh et al, 2015; Russell et al, 2013; Sigal  
63 et al, 2011; Zhong et al, 2013), where an interaction between the infected donor cell and the  
64 uninfected target results in directed transmission of large numbers of virions (Baxter et al, 2014;  
65 GropPELLI et al, 2015; Hubner et al, 2009; Sowinski et al, 2008). This is in contrast to cell-free  
66 infection, where free-floating virus finds target cells through diffusion. Both modes occur  
67 simultaneously when infected donor cells are cocultured with targets, though the cell-to-cell  
68 route is the main cause of multiple infections per cell (Hubner et al, 2009). In the lymph nodes,  
69 several studies showed multiple infections (Gratton et al, 2000; Jung et al, 2002; Law et al,  
70 2016) while another study did not (Josefsson et al, 2013). One explanation for the divergent  
71 results is that different cell subsets are infected to different degrees. For example, T cells were  
72 shown not to be multiply infected in the peripheral blood compartment (Josefsson et al, 2011).  
73 However, more recent work investigating markers associated with HIV latency in the face of  
74 ART found that the average number of HIV DNA copies per cell is greater than one in 3 out of  
75 12 individuals in the face of ART in the CD3 positive, CD32a high CD4 T cell subset (Descours  
76 et al, 2017). In the absence of suppressive ART, it would be expected that the number of HIV  
77 DNA copies per cell would be higher.

78 Multiple viral integration attempts per cell may increase the probability of death. One  
79 consequence of HIV mediated death may be that attenuation of infection may increase viral  
80 replication by increasing the number of live targets. Indeed, it has been suggested that more  
81 attenuated HIV strains result in more successful infections in terms of the ability of the virus to

82 replicate in the infected individual (Arien et al, 2005; Nowak & May, 2000; Payne et al, 2014;  
83 Quinones-Mateu & Arts, 2006; Wodarz & Levy, 2007).

84 Here we experimentally examined the effect of attenuating cell-to-cell spread by using HIV  
85 inhibitors. We observed that partially inhibiting infection with drug or antibody resulted in an  
86 increase in the number of live infected lymph node cells, experimentally demonstrating for the  
87 first time at the cellular level that attenuation of HIV infection can result in an increase in live  
88 infected cells under specific infection conditions.

## 89 Results

90 We introduce a model of infection where each donor to target transmission leads to an infection  
91 probability  $r$  and death probability  $q$ . The probability of infection of a target given  $\lambda$  infecting  
92 virions is  $1-(1-r)^\lambda$  (Sigal et al, 2011). The probability of a cell to be infected and not die after it  
93 has been exposed to  $\lambda$  transmitted virions is therefore:

$$94 \quad P_\lambda = (1 - (1-r)^\lambda) (1-q)^\lambda. \quad (1)$$

95 This model makes several simplifying assumptions: 1) all transmissions have equal probabilities  
96 to infect targets. 2) The probability for a cell to die from each transmission is equal between  
97 transmissions. 3) Productive infection and death are independent events.

98 Since antiretroviral drugs lead to a reduction in the number of infecting virions by, for example,  
99 decreasing the probability of reverse transcription in the case of reverse transcriptase inhibitors,  
100 we introduced a drug strength value  $d$ , where  $d=1$  in the absence of drug and  $d>1$  in the  
101 presence of drug. In the presence of drug,  $\lambda$  is decreased to  $\lambda/d$ . The drug therefore tunes  $\lambda$ ,  
102 and if the antiretroviral regimen is fully suppressive,  $\lambda/d$  is expected to be below what is required  
103 for ongoing replication. The probability of a cell to be infected and live given drug strength  $d$  is  
104 therefore:

$$105 \quad P_\lambda = (1 - (1-r)^{\lambda/d}) (1-q)^{\lambda/d}. \quad (2)$$

106 By this model, the probability to be infected and not die  $P_\lambda$  depends on the number of virions  
107 and has two parameters,  $r$  and  $q$ , as well as two measurable inputs,  $\lambda$  and  $d$ , where  $d/\lambda$   
108 measures the effect of drug relative to infection strength per cell. Analysis of the probability of a  
109 cell to survive and be infected as a function of  $r$  and  $q$  shows that at each drug strength  $d/\lambda$ ,  $P_\lambda$   
110 increases as the probability of infection  $r$  increases, regardless of the probability of death per

111 infection  $q$  (Figure 1). Whether and how  $P_\lambda$  behaves when drug strength  $d/\lambda$  increases depends  
112 on parameter values of  $r$  and  $q$ . A subset of parameter values results in a peak in the number of  
113 infected cells at intermediate  $d/\lambda$ , decreasing as drug strength increases further (Figure 1). We  
114 refer to such a peak in infected numbers as an infection optimum. As  $q$  increases, the cost of  
115 multiple infections per cell increases, and the infection optimum shifts to higher  $d/\lambda$  values. A fall  
116 from the infection optimum at decreasing  $d/\lambda$  is driven by increasing cell death as a result of  
117 increasing infection attempts per cell. This slope is therefore shallower, and peaks broader, at  
118 low  $q$  values (Figure 1).

119 Given that an infection optimum is dependent on parameter values, we next tested whether  
120 these parameter values occur experimentally in HIV infection. We therefore first tested for an  
121 infection optimum in the RevCEM cell line engineered to express GFP upon HIV Rev protein  
122 expression (Wu et al, 2007). We subcloned the cell line to obtain clone E7 which maximized the  
123 frequency of GFP positive cells upon infection (Boullé et al, 2016).

124 We needed to detect the number of integration attempts per cell  $\lambda$ . To estimate this, we used  
125 PCR to detect the number of reverse transcribed copies of viral DNA in the cell by splitting each  
126 individual infected cell over multiple wells and detecting the number of wells with the expected  
127 PCR product. Hence, the number of positive wells indicates the minimum number of viral DNA  
128 copies per cell, since more than one copy can be contained within the same well (Josefsson et  
129 al, 2011; Josefsson et al, 2013). We first examined the number of viral DNA copies in ACH-2  
130 cells, reported to contain single inactive HIV integration per genome (Chun et al, 1997;  
131 O'Doherty et al, 2002). We sorted individual ACH-2 cells and split the single cell lysates into  
132 multiple wells (Figure 2 – figure supplement 1A). About one quarter of cells showed a PCR  
133 product of the expected size (Figure 2 – figure supplement 1B). Similar results were obtained  
134 with cell-free infection of E7 RevCEM cells (Figure 2 – figure supplement 1C).

135 To investigate the effect of multiple infection attempts per cell, we used coculture infection,  
136 where infected (donor) cells are co-incubated with uninfected (target) cells and lead to cell-to-  
137 cell spread. Live infected target cells were assayed after 2 days in coculture with infected  
138 donors. Live infected cells were identified based on the absence of cell death indicator dye  
139 DRAQ7 fluorescence, and presence of GFP (Figure 2A). We used approximately 2% infected  
140 donor cells as our input, and detected the number of HIV DNA copies per cell by sorting  
141 individual cell and splitting the individual cell lysates over 10 wells of an agarose gel (Figure 2B).  
142 We obtained a wide distribution of viral DNA copies per cell, ranging from 0 to 8 (Figure 2C). We

143 computationally corrected the detected number of DNA copies for the sensitivity of our PCR  
144 reaction as determined by the ACH-2 results (Materials and Methods). On average we obtained  
145 14 copies per cell after correction.

146 To tune  $\lambda$ , we added the HIV reverse transcriptase inhibitor efavirenz (EFV) to infections. To  
147 calculate  $d$ , we used cell-free infection, which we verified results in single integrations per cell  
148 (Figure 2D, see Figure 2–figure supplement 2 for logarithmic y-axis plot). For cell-free infection,  
149 we approximate  $d = 1/Tx$ , where  $Tx$  is defined as the number of infected cells with drug divided  
150 by the number of infected cells without drug (see Materials and Methods and (Sigal et al,  
151 2011)), equivalent to the fraction of unaffected cells in a previously described approach  
152 modelling the infection response to inhibitor with two parameters: the 50% inhibitory drug  
153 concentration ( $IC_{50}$ ) and the Hill coefficient for drug action (Shen et al, 2008). We fitted the  
154 observed response of infection to EFV to using this approach to estimate  $d$  across a range of  
155 EFV concentrations. The best fit of the model to the cell-free data using EFV sensitive HIV  
156 showed a monotonic decrease with  $IC_{50}=2.9\text{nM}$  and Hill coefficient of 2.1 (Figure 2D, black line).

157 We next dialled in EFV to tune  $\lambda/d$  in coculture infection. We observed a peak in the number of  
158 live infected target cells at 4nM EFV (Figure 2E). Equation (2) best fit the behaviour of infection  
159 when  $r = 0.4$  and  $q = 0.11$  (Figure 2E, black line). Hence an infection optimum is present in the  
160 cell line infection system.

161 We repeated the experiment with EFV resistant HIV. To derive the resistant mutant, we cultured  
162 EFV sensitive HIV in our reporter cell line in the presence of EFV. We obtained the L100I  
163 partially resistant mutant. We then replaced the reverse transcriptase of the wild type molecular  
164 clone with the mutant reverse transcriptase gene (Materials and Methods). We derived  $d_{mut}$  for  
165 the L100I mutant using cell-free mutant infection (Figure 3A, see Figure 3–figure supplement 1  
166 for logarithmic y-axis plot). L100I mutant was found to have an  $IC_{50}=29\text{nM}$  EFV and Hill  
167 coefficient of 2.0 (Figure 3A, black line).

168 We next performed coculture infection. Like with wild type HIV coculture infection, there was a  
169 peak in the number of live infected target cells for the L100I mutant infection, but it was shifted  
170 to 80nM EFV (Figure 3B), an EFV concentration which a decreased cell-free mutant infection  
171 approximately 9-fold and  $\lambda/d_{mut} \sim 2$ . Fits were obtained to Equation (2) using  $d_{mut}$  values and  $\lambda$   
172 measured for wild type infection. The fits recapitulated the experimental results when  $r = 0.9$  and  
173  $q = 0.06$  (Figure 3B, black line).

174 In order to examine whether a peak in live infected targets can be obtained with an unrelated  
175 inhibitor, we used the HIV neutralizing antibody b12. This antibody is effective against cell-to-  
176 cell spread of HIV (Baxter et al, 2014; Reh et al, 2015). We obtained a peak with 5ug/ml b12  
177 (Figure 4). The b12 concentration that resulted in a peak number of live infected cells was the  
178 same for wild type virus and the L100I mutant, showing L100I mutant fitness gain was EFV  
179 specific.

180 While the RevCEM cell line is a useful tool to illustrate the principles governing the formation of  
181 an infection optimum, the sensitivity of such an optimum to parameter values would make its  
182 presence in primary HIV target cells speculative. We therefore investigated whether a fitness  
183 optimum occurs in primary human lymph node cells, the anatomical site of which would be most  
184 likely associated with a high force of infection. We derived human lymph nodes from HIV  
185 negative individuals from indicated lung resections (S Table 1), cellularized the lymph node  
186 tissue, and infected the resulting lymph node cells with HIV by coculture infection. A fraction of  
187 the cells was infected by cell-free and used as infected donor cells. We added these to  
188 uninfected target cells from the same lymph node, and detected the number of live infected cells  
189 after 4 days of infection with the L100I EFV resistant mutant in the face of EFV. We detected the  
190 number of live infected cells by the exclusion of dead cells with the death detection dye  
191 eFluor660 followed by single cell staining for HIV Gag using anti-p24 antibody (Figure 5A).

192 In each of the lymph nodes tested, we observed a peak in live infected cells at intermediate EFV  
193 concentrations. The infection optimum in the lymph node of participant 205 was visible as a  
194 plateau between 50 and 200 nM EFV (Figure 5A, first row). The lymph node from participant  
195 251 showed a peak at 100nM EFV (Figure 5A, second row). In the presence of EFV, there was  
196 a decrease in the fraction of dead cells that was offset by a similar increase in the fraction of live  
197 infected cells for lymph nodes from both participants. There were more overall detectable cells  
198 with EFV, resulting in differences in the absolute concentrations of live infected cells being  
199 larger than the differences in the fractions of live infected cells between EFV and non-drug  
200 treated cells (Figure 5A, with absolute number of live infected cells shown in parentheses in the  
201 flow cytometry plots). This is most likely due to cells which died early becoming fragments and  
202 so being excluded from the total population in the absence of EFV.

203 We used a lymph node from a third individual, where we obtained more cells, to examine the  
204 number of HIV DNA copies per cell. This lymph node also showed an infection optimum at  
205 50nM EFV (Figure 5A, third row). To detect the effect of EFV on integrations per cell, we sorted

206 single cells based on p24 positive signal, de-crosslinked to remove the fixative (Materials and  
207 Methods), then divided each cell into 4 wells. As with the cell line, we detected HIV DNA copies  
208 by PCR 48 hours post-infection. We observed multiple DNA copies in EFV untreated lymph  
209 node cells. The number of copies decreased with EFV (Figure 5B). We corrected for sensitivity  
210 of detection as quantified in ACH-2 cells (Materials and Methods). The corrected numbers were  
211 21 HIV DNA copies with no drug, and 5 copies in the presence of EFV at the infection optimum  
212 (Figure 5C, see Figure 5–figure supplement 1 for histograms of raw HIV DNA copy numbers per  
213 cell). Hence, the decrease in the number of copies still results in sufficient copies to infect the  
214 cell.

215 Since L100I does not often occur in the absence of other drug resistance mutations according to  
216 the Stanford HIV Drug Resistance Database (Rhee et al, 2003), we repeated the experiment  
217 with the K103N mutant, a frequently observed mutation in virologic failure with a higher level of  
218 resistance to EFV relative to the L100I mutant. We used cell-free infection to obtain drug  
219 inhibition per virion at each level of EFV, which we denote  $d_{103}$  (Figure 6A, see Figure 6–figure  
220 supplement 1 for logarithmic y-axis plot). The fits showed a monotonic decrease with  
221  $IC_{50}=26.0\text{nM}$  and Hill coefficient of 1.5 (Figure 6A, black line). We then proceeded to use the  
222 K103N mutant in coculture infection, using cells from two different lymph nodes in different  
223 experiments (see Figure 6–figure supplement 2 for results of individual experiments). The peak  
224 in the number of live infected cells in the presence of drug was between 80 and 160nM EFV  
225 (Figure 6B). Fits were obtained to Equation (2) using  $d_{103}$  values and the number of DNA copies  
226 in the absence of drug measured for L100I infection. The fits recapitulated the experimental  
227 results when  $r=0.7$  and  $q=0.06$  (Figure 6B, black line).

## 228 Discussion

229 The optimal virulence concept in ecology proposes that virulence needs to be balanced against  
230 host survival for optimal pathogen spread (Bonhoeffer et al, 1996; Bonhoeffer & Nowak, 1994;  
231 Gandon et al, 2001; Jensen et al, 2006). At the cellular level, this implies that the number of  
232 successfully infected cells may increase when infection virulence is reduced. The current study  
233 is, to our knowledge, the first to address this question experimentally at the level of individual  
234 cells infected with HIV.

235 Using a model where cells are infected and die in a probabilistic way, we found that there were  
236 two possible outcomes of partially inhibiting infection. In the case where cells were infected by  
237 single virions, inhibition always led to a decline in the number of live infected cells, since



238 inhibition reduced the number of infections per cell from one to zero. In contrast, in the case  
239 where multiple virions infected a cell, the possibility existed that inhibition reduced the number of  
240 integrating virions, without extinguishing infection of the cell completely. If each HIV integration  
241 increases the probability of cell death, reducing the number of integrations without eliminating  
242 infection should lead to an increased probability of infected cell survival, and consequently to an  
243 increase in the number of live infected cells.

244 We investigated the outcome of partial inhibition of infection in both a cell line and primary  
245 lymph node cells. In both systems, we observed that there was a peak in live infected cell  
246 number at intermediate inhibitor concentrations. This correlated to a decreased number of viral  
247 DNA copies per cell. Further increasing inhibitor concentration led to a decline in live infected  
248 cell numbers, and infecting with EFV resistant mutants shifted the peak in live infected number  
249 to higher EFV concentrations. Our model as described by Equation (2) reproduced the essential  
250 behaviour of the experimental results. The model can be further refined using a distribution for  
251 the number of DNA copies per cell, and indeed the number of HIV DNA copies per lymph node  
252 cell in the presence of EFV seems bimodal (Figure 5–figure supplement 1B), with highly  
253 infected cells and cells with fewer HIV copies. Given that the simpler model was sufficient to  
254 explain the general behaviour of coculture infection in the face of inhibitor, we did not introduce  
255 a distribution in our model to avoid adding an extra unmeasured parameter.

256 These observations reinforce previous results showing that HIV integrations are cytotoxic  
257 (Cooper et al, 2013). In addition to HIV cytotoxicity caused by viral integrations through the  
258 mechanism of double strand breaks, other mechanisms of HIV induced death are also present,  
259 including IFI16 dependent innate immune system sensing of abortive reverse transcripts  
260 following non-productive infection of resting T cells (Doitsh et al, 2014; Monroe et al, 2014). The  
261 experiments presented here reflect the effect of partial inhibition on productive infection of HIV  
262 target cells, which mostly consist of activated T cell subsets, not resting T cells. More complex  
263 models would be needed to decipher the effect of partial inhibition of HIV infection on resting T  
264 cell numbers and the outcome of this in terms of available T cell targets in future infection  
265 cycles.

266 The clinical implications of an infection optimum in the presence of EFV with EFV sensitive HIV  
267 strains are likely to be negligible, since the drug concentrations at which an infection optimum  
268 occurs are extremely low. However, for EFV resistant HIV, the infection optimum shifts to the  
269 range of EFV concentrations observed in lymph nodes (~100nM) (Fletcher et al, 2014b), and

270 can be expected to shift to even higher EFV concentrations with more resistant mutants. As  
271 EFV has a longer half-life than the other antiretrovirals co-formulated with it, it may be the only  
272 agent present in partially adherent individuals for substantial periods of time (Taylor et al, 2007).  
273 Therefore, partial inhibition of HIV infection with EFV may provide a surprising advantage to  
274 EFV resistant mutants, and may allow individuals failing therapy to better transmit drug resistant  
275 strains.

## 276 **Materials and Methods**

### 277 **Ethical statement**

278 Lymph nodes were obtained from the field of surgery of participants undergoing surgery for  
279 diagnostic purposes and/or complications of inflammatory lung disease. Informed consent was  
280 obtained from each participant, and the study protocol approved by the University of KwaZulu-  
281 Natal Institutional Review Board (approval BE024/09).

282

### 283 **Inhibitors, viruses and cells**

284 The following reagents were obtained through the AIDS Research and Reference Reagent  
285 Program, National Institute of Allergy and Infectious Diseases, National Institutes of Health: the  
286 antiretroviral EFV; RevCEM cells from Y. Wu and J. Marsh; HIV molecular clone pNL4-3 from  
287 M. Martin. Cell-free viruses were produced by transfection of HEK293 cells with pNL4-3 using  
288 TransIT-LT1 (Mirus) or Fugene HD (Roche) transfection reagents. Virus containing supernatant  
289 was harvested after two days of incubation and filtered through a 0.45µm filter (Corning). The  
290 number of virus genomes in viral stocks was determined using the RealTime HIV-1 viral load  
291 test (Abbott Diagnostics). The L100I and K103N mutants were evolved by serial passages of  
292 wild type NL4-3 in E7 RevCEM cells in the presence of 20nM EFV. After 16 days of selection,  
293 the reverse transcriptase gene was cloned from the proviral DNA and the mutant reverse  
294 transcriptase gene was inserted into the NL4-3 molecular clone. To produce the E7 RevCEM  
295 cell clone, RevCEM cells were subcloned at single cell density and screened for the fraction of  
296 GFP expressing cells upon HIV infection using microscopy. Cell culture and experiments were  
297 performed in complete RPMI 1640 medium supplemented with L-Glutamine, sodium pyruvate,  
298 HEPES, non-essential amino acids (Lonza), and 10% heat-inactivated FBS (Hyclone).

299

### 300 **Infection**

301 For a cell-free infection of E7 RevCEM and lung lymph node cells,  $10^6$  cells/ml were infected  
302 with  $2 \times 10^8$  NL4-3 viral copies/ml (~20ng p24 equivalent) for 2 days. For coculture infection,  
303 infected cells from the cell-free infection were used as the donors and cocultured with target  
304 cells. For E7 RevCEM, 2% infected donor cells were added to uninfected targets and cocultured  
305 for 2 days. For lymph node cells, a ratio of 1:4 donor to targets cells was used and infection  
306 incubated for 4 days.

### 307 **Staining and flow cytometry**

308 E7 RevCEM reporter cells were stained with 300nM of the live cell impermeable dye DRAQ7  
309 (Biolegend) immediately before flow cytometry and live infected cells detected as the number of  
310 DRAQ7 negative, GFP positive cells. Lymph node cells were resuspended in 1ml of phosphate  
311 buffered saline (PBS) and stained at a 1:1000 dilution of the eFluor660 dye (eBioscience)  
312 according to the manufacturer's instructions. Cells were then fixed and permeabilized using the  
313 BD Cytofix/Cytoperm Fixation/Permeabilization kit (BD Biosciences) according to the  
314 manufacturer's instructions. Cells were then stained with anti-p24 FITC conjugated antibody  
315 (KC57, Beckman Coulter). Live infected lymph node cells were detected as the number of  
316 eFluor660 negative, p24 positive cells. Cells were acquired with a FACSAriaIII or FACSCaliber  
317 machine (BD Biosciences) using 488 and 633nm laser lines. Results were analysed with FlowJo  
318 10.0.8 software. For single cell sorting to detect the number of HIV DNA copies per cell, cells  
319 were single cell sorted using 85 micron nozzle in a FACSAriaIII or FACSARIA Fusion machine.  
320 GFP positive, DRAQ7 negative E7 RevCEM were sorted into 96 well plates (Biorad) containing  
321 30µl lysis buffer (2.5µl 0.1M Dithiothreitol, 5µl 5% NP40 and 22.5µl molecular biology grade  
322 water (Kurimoto et al, 2007)). Fixed, p24 positive, eFluor660 negative lymph node cells were  
323 single cell sorted into 96 well plates containing 5ul of PKD buffer (Qiagen) with 1:16 proteinase  
324 K solution (Qiagen) (Thomsen et al, 2016). Sorted plates were snap frozen and kept at -80°C  
325 until ready for PCR.

326

### 327 **Determination of HIV DNA copy number in individual cells**

328 Plates were thawed at room temperature and spun down. Fixed cells were de-crosslinked by  
329 incubating in a thermocycler at 56°C for 1 hour. The lysate from each well was split equally over  
330 10 wells (2.5µl each well after correction for evaporation) for E7 RevCEM or 4 wells (6.8µl each  
331 well after correction for evaporation) for lymph nodes, containing 50µl of Phusion hot start II  
332 DNA polymerase (New England Biolabs) PCR reaction mix (10µl 5X Phusion HF buffer, 1µl  
333 dNTPs, 2.5µl of the forward primer, 2.5µl of the reverse primer, 0.5µl Phusion hot start II DNA

334 polymerase, 2.5µl of DMSO and molecular biology grade water to 50µl reaction volume). Two  
335 rounds of PCR were performed. The first round reaction amplified a 700bp region of the reverse  
336 transcriptase gene using the forward primer 5' CCTACACCTGTCAACATAATTGGAAG 3' and  
337 reverse primer 5' CATCAGAAAGAACCTCCATTC 3'. Cycling program was 98°C for 30  
338 seconds, then 34 cycles of 98°C for 10 seconds, 63°C for 30 seconds and 72°C for 15 seconds  
339 with a final extension of 72°C for 5 minutes. 1µl of the first round product was then transferred  
340 into a PCR mix as above, with nested second round primers (forward 5'  
341 TAAAAGCATTAGTAGAAATTTGTACAGA 3', reverse 5' CATCTGTTGAGGTGGGGATTTACC  
342 3'). The second round PCR amplified a 550bp product which was then visualized on a 1%  
343 agarose gel. PCR reactions were found to work best if sorted plates were thawed no more than  
344 once, and plates which underwent repeated freeze-thaw cycles showed poor amplification.

345

### 346 **Correction of raw number of detected DNA copies for detection sensitivity**

347 A stochastic simulation in Matlab was used to generate a distribution for the number of positive  
348 wells per cell for each mean number of DNA copies per cell  $\lambda$ . The probability for a DNA copy to  
349 be present within a given well and be detected was set as  $\sigma/w$ , where  $\sigma$  was the detection  
350 sensitivity calculated as the number of ACH-2 with detectable integrations divided by the total  
351 number of ACH-2 cells assayed (19/72,  $\sigma = 0.26$ ), and  $w$  was the number of wells. A random  
352 number  $m$  representing DNA copies per cell from a Poisson distribution with a mean  $\lambda$  was  
353 drawn, and a vector  $R$  of  $m$  random numbers from a uniform distribution was generated. If there  
354 existed an element  $R_i$  of the vector with a value between 0 and  $\sigma/w$ , the first well was occupied.  
355 If an element existed with a value between  $\sigma/w + \epsilon$  and  $2(\sigma/w)$ , the second well was occupied,  
356 and if between  $(\sigma/w + \epsilon)(n-1)$  and  $n(\sigma/w)$ , the  $n$ th well was occupied. The sum of wells occupied  
357 at least once was determined, and the process repeated  $j$  times for each  $\lambda$ , where  $j$  was the  
358 number of cells in the experimental data. A least squares fit was performed to select  $\lambda$  which  
359 best fit the experimental results across well frequencies, and mean and standard deviation for  $\lambda$   
360 was derived by repeating the simulation 10 times.

361

### 362 **Fit of the EFV response for single infections using $IC_{50}$ and Hill coefficient**

363 To obtain  $d$ , we normalized Equation (2) by the fraction of infected cells in the absence of drug  
364 (Sigal et al, 2011) to obtain  $Tx = (\text{infected targets with EFV}) / (\text{infected targets no EFV}) = ((1 - (1 - r)^{\lambda/d}) (1 - q)^{\lambda/d}) / ((1 - (1 - r)^{\lambda}) (1 - q)^{\lambda})$ . We approximate the result at small  $r, q$  to  $Tx = (1 - e^{-r\lambda/d}) e^{-q\lambda/d} / (1 - e^{-r\lambda}) e^{-q\lambda} = e^{q\lambda(1-1/d)} ((1 - e^{-r\lambda/d}) / (1 - e^{-r\lambda}))$ . Expanding the exponentials we obtain  $Tx = (1 + q\lambda(1-1/d)) ((-r\lambda/d) / -r\lambda) = (1 + q\lambda(1-1/d))(1/d)$ . We note that at  $\lambda < 1$ ,  $q\lambda(1-1/d) \ll 1$ , and hence  $Tx \cong 1/d$ .  $Tx$  was

368 measured from the experiments to obtain  $d$  values at the EFV concentrations used for cell-free  
369 infection, where  $\lambda < 1$ . To obtain a fit of  $d$  as a function of  $IC_{50}$  and Hill coefficient ( $h$ ) for EFV, we  
370 used the relation the relation for the fraction of unaffected infections ( $F_u$ , (Shen et al, 2008)),  
371 whose definition is equivalent to  $Tx$  at  $\lambda < 1$ :

$$372 \quad 1/d = 1 - \frac{1}{1 + \left(\frac{IC_{50}}{[EFV]}\right)^h}. \quad (3)$$

373

### 374 **Acknowledgements**

375 AS was supported by a Human Frontiers Science Program Career Development Award CDA  
376 00050/2013. RAN is supported by the European Research Council through grant Stg. 260686.  
377 LJ is supported by a fellowship from the South African National Research Foundation. IMF is  
378 supported through the Sub-Saharan African Network for TB/HIV Research Excellence  
379 (SANTHE), a DELTAS Africa Initiative (grant #DEL-15-006).

380

### 381 **Author contributions**

382 AS and LJ designed the study. RM, JB, KJD, CC, YG, KK, and FK designed, coordinated and  
383 implemented collection and processing of lymph node samples. LJ, JH, SC, IF, AY, MB, and GL  
384 performed the experiments. AS and RAN derived the mathematical model. AS performed the  
385 simulations and model fits. All authors discussed the results. AS, LJ, JH, IF, and RAN wrote the  
386 manuscript.

387

### 388 **Conflict of interest**

389 The authors declare that they have no conflict of interest.

390

### 391 **References**

392 Arien KK, Troyer RM, Gali Y, Colebunders RL, Arts EJ, Vanham G (2005) Replicative fitness of historical  
393 and recent HIV-1 isolates suggests HIV-1 attenuation over time. *AIDS* **19**: 1555-1564

394

395 Banda NK, Bernier J, Kurahara DK, Kurrle R, Haigwood N, Sekaly RP, Finkel TH (1992) Crosslinking CD4 by  
396 human immunodeficiency virus gp120 primes T cells for activation-induced apoptosis. *J Exp Med* **176**:  
397 1099-1106

398

- 399 Baxter AE, Russell RA, Duncan CJ, Moore MD, Willberg CB, Pablos JL, Finzi A, Kaufmann DE, Ochsenbauer  
400 C, Kappes JC, Groot F, Sattentau QJ (2014) Macrophage infection via selective capture of HIV-1-infected  
401 CD4+ T cells. *Cell Host Microbe* **16**: 711-721
- 402
- 403 Bonhoeffer S, Lenski RE, Ebert D (1996) The curse of the pharaoh: the evolution of virulence in  
404 pathogens with long living propagules. *Proceedings of the Royal Society of London B: Biological Sciences*  
405 **263**: 715-721
- 406
- 407 Bonhoeffer S, May RM, Shaw GM, Nowak MA (1997) Virus dynamics and drug therapy. *Proc Natl Acad*  
408 *Sci U S A* **94**: 6971-6976
- 409
- 410 Bonhoeffer S, Nowak MA (1994) Mutation and the evolution of virulence. *Proceedings of the Royal*  
411 *Society of London B: Biological Sciences* **258**: 133-140
- 412
- 413 Boullé M, Müller TG, Dähling S, Ganga Y, Jackson L, Mahamed D, Oom L, Lustig G, Neher RA, Sigal A  
414 (2016) HIV Cell-to-Cell Spread Results in Earlier Onset of Viral Gene Expression by Multiple Infections per  
415 Cell. *PLoS Pathog* **12**: e1005964
- 416
- 417 Brenchley JM, Schacker TW, Ruff LE, Price DA, Taylor JH, Beilman GJ, Nguyen PL, Khoruts A, Larson M,  
418 Haase AT, Douek DC (2004) CD4+ T cell depletion during all stages of HIV disease occurs predominantly  
419 in the gastrointestinal tract. *J Exp Med* **200**: 749-759
- 420
- 421 Chun T-W, Carruth L, Finzi D, Shen X (1997) Quantification of latent tissue reservoirs and total body viral  
422 load in HIV-1 infection. *Nature* **387**: 183
- 423
- 424 Cooper A, Garcia M, Petrovas C, Yamamoto T, Koup RA, Nabel GJ (2013) HIV-1 causes CD4 cell death  
425 through DNA-dependent protein kinase during viral integration. *Nature* **498**: 376-379
- 426
- 427 Dale BM, McNerney GP, Thompson DL, Hubner W, de Los Reyes K, Chuang FY, Huser T, Chen BK (2011)  
428 Cell-to-cell transfer of HIV-1 via virological synapses leads to endosomal virion maturation that activates  
429 viral membrane fusion. *Cell Host Microbe* **10**: 551-562
- 430
- 431 Dang Q, Chen J, Unutmaz D, Coffin JM, Pathak VK, Powell D, KewalRamani VN, Maldarelli F, Hu WS  
432 (2004) Nonrandom HIV-1 infection and double infection via direct and cell-mediated pathways. *Proc*  
433 *Natl Acad Sci U S A* **101**: 632-637
- 434
- 435 Del Portillo A, Tripodi J, Najfeld V, Wodarz D, Levy DN, Chen BK (2011) Multiploid inheritance of HIV-1  
436 during cell-to-cell infection. *J Virol*
- 437

- 438 Deleage C, Wietgreffe SW, Del Prete G, Morcock DR, Hao XP, Piatak Jr M, Bess J, Anderson JL, Perkey KE,  
439 Reilly C (2016) Defining HIV and SIV reservoirs in lymphoid tissues. *Pathogens & immunity* **1**: 68
- 440
- 441 Descours B, Petitjean G, López-Zaragoza J-L, Bruel T, Raffel R, Psomas C, Reynes J, Lacabaratz C, Levy Y,  
442 Schwartz O (2017) CD32a is a marker of a CD4 T-cell HIV reservoir harbouring replication-competent  
443 proviruses. *Nature* **543**: 564-567
- 444
- 445 Dixit NM, Perelson AS (2004) Multiplicity of human immunodeficiency virus infections in lymphoid  
446 tissue. *J Virol* **78**: 8942-8945
- 447
- 448 Doitsh G, Cavrois M, Lassen KG, Zepeda O, Yang Z, Santiago ML, Hebbeler AM, Greene WC (2010)  
449 Abortive HIV infection mediates CD4 T cell depletion and inflammation in human lymphoid tissue. *Cell*  
450 **143**: 789-801
- 451
- 452 Doitsh G, Galloway NL, Geng X, Yang Z, Monroe KM, Zepeda O, Hunt PW, Hatano H, Sowinski S, Munoz-  
453 Arias I, Greene WC (2014) Cell death by pyroptosis drives CD4 T-cell depletion in HIV-1 infection. *Nature*  
454 **505**: 509-514
- 455
- 456 Duncan CJ, Russell RA, Sattentau QJ (2013) High multiplicity HIV-1 cell-to-cell transmission from  
457 macrophages to CD4+ T cells limits antiretroviral efficacy. *AIDS* **27**: 2201-2206
- 458
- 459 Embretson J, Zupancic M, Ribas JL, Burke A, Racz P, Tenner-Racz K, Haase AT (1993) Massive covert  
460 infection of helper T lymphocytes and macrophages by HIV during the incubation period of AIDS. *Nature*  
461 **362**: 359
- 462
- 463 Finkel TH, Tudor-Williams G, Banda NK, Cotton MF, Curiel T, Monks C, Baba TW, Ruprecht RM, Kupfer A  
464 (1995) Apoptosis occurs predominantly in bystander cells and not in productively infected cells of HIV-  
465 and SIV-infected lymph nodes. *Nat Med* **1**: 129-134
- 466
- 467 Fletcher CV, Staskus K, Wietgreffe SW, Rothenberger M, Reilly C, Chipman JG, Beilman GJ, Khoruts A,  
468 Thorkelson A, Schmidt TE (2014a) Persistent HIV-1 replication is associated with lower antiretroviral  
469 drug concentrations in lymphatic tissues. *Proceedings of the National Academy of Sciences* **111**: 2307-  
470 2312
- 471
- 472 Fletcher CV, Staskus K, Wietgreffe SW, Rothenberger M, Reilly C, Chipman JG, Beilman GJ, Khoruts A,  
473 Thorkelson A, Schmidt TE, Anderson J, Perkey K, Stevenson M, Perelson AS, Douek DC, Haase AT,  
474 Schacker TW (2014b) Persistent HIV-1 replication is associated with lower antiretroviral drug  
475 concentrations in lymphatic tissues. *Proc Natl Acad Sci U S A* **111**: 2307-2312
- 476

- 477 Galloway NL, Doitsh G, Monroe KM, Yang Z, Munoz-Arias I, Levy DN, Greene WC (2015) Cell-to-Cell  
478 Transmission of HIV-1 Is Required to Trigger Pyroptotic Death of Lymphoid-Tissue-Derived CD4 T Cells.  
479 *Cell Rep* **12**: 1555-1563
- 480
- 481 Gandon S, Mackinnon MJ, Nee S, Read AF (2001) Imperfect vaccines and the evolution of pathogen  
482 virulence. *Nature* **414**: 751-756
- 483
- 484 Gratton S, Cheynier R, Dumaourier M-J, Oksenhendler E, Wain-Hobson S (2000) Highly restricted spread  
485 of HIV-1 and multiply infected cells within splenic germinal centers. *Proceedings of the National*  
486 *Academy of Sciences* **97**: 14566-14571
- 487
- 488 Groot F, Welsch S, Sattentau QJ (2008) Efficient HIV-1 transmission from macrophages to T cells across  
489 transient virological synapses. *Blood* **111**: 4660-4663
- 490
- 491 Gropelli E, Starling S, Jolly C (2015) Contact-induced mitochondrial polarization supports HIV-1  
492 virological synapse formation. *J Virol* **89**: 14-24
- 493
- 494 Gummuluru S, KewalRamani VN, Emerman M (2002) Dendritic cell-mediated viral transfer to T cells is  
495 required for human immunodeficiency virus type 1 persistence in the face of rapid cell turnover. *J Virol*  
496 **76**: 10692-10701
- 497
- 498 Hollingsworth TD, Anderson RM, Fraser C (2008) HIV-1 transmission, by stage of infection. *Journal of*  
499 *Infectious Diseases* **198**: 687-693
- 500
- 501 Hubner W, McNerney GP, Chen P, Dale BM, Gordon RE, Chuang FY, Li XD, Asmuth DM, Huser T, Chen BK  
502 (2009) Quantitative 3D video microscopy of HIV transfer across T cell virological synapses. *Science* **323**:  
503 1743-1747
- 504
- 505 Jensen KH, Little T, Skorpung A, Ebert D (2006) Empirical support for optimal virulence in a castrating  
506 parasite. *PLoS biology* **4**: e197
- 507
- 508 Jolly C, Kashefi K, Hollinshead M, Sattentau QJ (2004) HIV-1 cell to cell transfer across an Env-induced,  
509 actin-dependent synapse. *J Exp Med* **199**: 283-293
- 510
- 511 Jolly C, Welsch S, Michor S, Sattentau QJ (2011) The regulated secretory pathway in CD4(+) T cells  
512 contributes to human immunodeficiency virus type-1 cell-to-cell spread at the virological synapse. *PLoS*  
513 *Pathog* **7**: e1002226
- 514



- 515 Josefsson L, King MS, Makitalo B, Brännström J, Shao W, Maldarelli F, Kearney MF, Hu W-S, Chen J,  
516 Gaines H (2011) Majority of CD4+ T cells from peripheral blood of HIV-1–infected individuals contain  
517 only one HIV DNA molecule. *Proceedings of the National Academy of Sciences* **108**: 11199-11204
- 518
- 519 Josefsson L, Palmer S, Faria NR, Lemey P, Casazza J, Ambrozak D, Kearney M, Shao W, Kottlil S, Sneller M  
520 (2013) Single cell analysis of lymph node tissue from HIV-1 infected patients reveals that the majority of  
521 CD4+ T-cells contain one HIV-1 DNA molecule. *PLoS Pathog* **9**: e1003432
- 522
- 523 Jung A, Maier R, Vartanian J-P, Bocharov G, Jung V, Fischer U, Meese E, Wain-Hobson S, Meyerhans A  
524 (2002) Recombination: Multiply infected spleen cells in HIV patients. *Nature* **418**: 144-144
- 525
- 526 Kurimoto K, Yabuta Y, Ohinata Y, Saitou M (2007) Global single-cell cDNA amplification to provide a  
527 template for representative high-density oligonucleotide microarray analysis. *Nature protocols* **2**: 739-  
528 752
- 529
- 530 Law KM, Komarova NL, Yewdall AW, Lee RK, Herrera OL, Wodarz D, Chen BK (2016) In Vivo HIV-1 Cell-to-  
531 Cell Transmission Promotes Multicopy Micro-compartmentalized Infection. *Cell Rep* **15**: 2771-2783
- 532
- 533 Mattapallil JJ, Douek DC, Hill B, Nishimura Y, Martin M, Roederer M (2005) Massive infection and loss of  
534 memory CD4+ T cells in multiple tissues during acute SIV infection. *Nature* **434**: 1093-1097
- 535
- 536 Monroe KM, Yang Z, Johnson JR, Geng X, Doitsh G, Krogan NJ, Greene WC (2014) IFI16 DNA sensor is  
537 required for death of lymphoid CD4 T cells abortively infected with HIV. *Science* **343**: 428-432
- 538
- 539 Munch J, Rucker E, Standker L, Adermann K, Goffinet C, Schindler M, Wildum S, Chinnadurai R, Rajan D,  
540 Specht A, Gimenez-Gallego G, Sanchez PC, Fowler DM, Koulov A, Kelly JW, Mothes W, Grivel JC, Margolis  
541 L, Keppler OT, Forssmann WG, Kirchhoff F (2007) Semen-derived amyloid fibrils drastically enhance HIV  
542 infection. *Cell* **131**: 1059-1071
- 543
- 544 Nowak M, May RM (2000) *Virus dynamics: mathematical principles of immunology and virology*:  
545 *mathematical principles of immunology and virology*: Oxford University Press, UK.
- 546
- 547 O'Doherty U, Swiggard WJ, Jeyakumar D, McGain D, Malim MH (2002) A sensitive, quantitative assay for  
548 human immunodeficiency virus type 1 integration. *Journal of virology* **76**: 10942-10950
- 549
- 550 Payne R, Muenchhoff M, Mann J, Roberts HE, Matthews P, Adland E, Hempenstall A, Huang KH,  
551 Brockman M, Brumme Z, Sinclair M, Miura T, Frater J, Essex M, Shapiro R, Walker BD, Ndung'u T,  
552 McLean AR, Carlson JM, Goulder PJ (2014) Impact of HLA-driven HIV adaptation on virulence in  
553 populations of high HIV seroprevalence. *Proc Natl Acad Sci U S A* **111**: E5393-5400
- 554

- 555 Perelson AS (2002) Modelling viral and immune system dynamics. *Nature Reviews Immunology* **2**: 28-36
- 556
- 557 Phillips AN (1996) Reduction of HIV concentration during acute infection: independence from a specific  
558 immune response. *Science* **271**: 497
- 559
- 560 Quinones-Mateu ME, Arts EJ (2006) Virus fitness: concept, quantification, and application to HIV  
561 population dynamics. *Curr Top Microbiol Immunol* **299**: 83-140
- 562
- 563 Reh L, Magnus C, Schanz M, Weber J, Uhr T, Rusert P, Trkola A (2015) Capacity of Broadly Neutralizing  
564 Antibodies to Inhibit HIV-1 Cell-Cell Transmission Is Strain- and Epitope-Dependent. *PLoS Pathog* **11**:  
565 e1004966
- 566
- 567 Rhee S-Y, Gonzales MJ, Kantor R, Betts BJ, Ravela J, Shafer RW (2003) Human immunodeficiency virus  
568 reverse transcriptase and protease sequence database. *Nucleic acids research* **31**: 298-303
- 569
- 570 Ribeiro RM, Qin L, Chavez LL, Li D, Self SG, Perelson AS (2010) Estimation of the initial viral growth rate  
571 and basic reproductive number during acute HIV-1 infection. *J Virol* **84**: 6096-6102
- 572
- 573 Russell RA, Martin N, Mitar I, Jones E, Sattentau QJ (2013) Multiple proviral integration events after  
574 virological synapse-mediated HIV-1 spread. *Virology* **443**: 143-149
- 575
- 576 Sanchez JL, Hunt PW, Reilly CS, Hatano H, Beilman GJ, Khoruts A, Jasurda JS, Somsouk M, Thorkelson A,  
577 Russ S (2015) Lymphoid fibrosis occurs in long-term nonprogressors and persists with antiretroviral  
578 therapy but may be reversible with curative interventions. *Journal of Infectious Diseases* **211**: 1068-1075
- 579
- 580 Shen L, Peterson S, Sedaghat AR, McMahon MA, Callender M, Zhang H, Zhou Y, Pitt E, Anderson KS,  
581 Acosta EP, Siliciano RF (2008) Dose-response curve slope sets class-specific limits on inhibitory potential  
582 of anti-HIV drugs. *Nat Med* **14**: 762-766
- 583
- 584 Sherer NM, Lehmann MJ, Jimenez-Soto LF, Horensavitz C, Pypaert M, Mothes W (2007) Retroviruses can  
585 establish filopodial bridges for efficient cell-to-cell transmission. *Nat Cell Biol* **9**: 310-315
- 586
- 587 Sigal A, Kim JT, Balazs AB, Dekel E, Mayo A, Milo R, Baltimore D (2011) Cell-to-cell spread of HIV permits  
588 ongoing replication despite antiretroviral therapy. *Nature* **477**: 95-98
- 589
- 590 Sourisseau M, Sol-Foulon N, Porrot F, Blanchet F, Schwartz O (2007) Inefficient human  
591 immunodeficiency virus replication in mobile lymphocytes. *Journal of virology* **81**: 1000-1012
- 592

593 Sowinski S, Jolly C, Berninghausen O, Purbhoo MA, Chauveau A, Kohler K, Oddos S, Eissmann P, Brodsky  
594 FM, Hopkins C, Onfelt B, Sattentau Q, Davis DM (2008) Membrane nanotubes physically connect T cells  
595 over long distances presenting a novel route for HIV-1 transmission. *Nat Cell Biol* **10**: 211-219

596  
597 Taylor S, Boffito M, Khoo S, Smit E, Back D (2007) Stopping antiretroviral therapy. *AIDS* **21**: 1673-1682

598  
599 Tenner-Racz K, Stellbrink H-J, Van Lunzen J, Schneider C, Jacobs J-P, Raschdorff B, Großschupff G,  
600 Steinman RM, Racz P (1998) The unenlarged lymph nodes of HIV-1–infected, asymptomatic patients  
601 with high CD4 T cell counts are sites for virus replication and CD4 T cell proliferation. The impact of  
602 highly active antiretroviral therapy. *Journal of Experimental Medicine* **187**: 949-959

603  
604 Thomsen ER, Mich JK, Yao Z, Hodge RD, Doyle AM, Jang S, Shehata SI, Nelson AM, Shapovalova NV, Levi  
605 BP (2016) Fixed single-cell transcriptomic characterization of human radial glial diversity. *Nature*  
606 *methods* **13**: 87-93

607  
608 Wawer MJ, Gray RH, Sewankambo NK, Serwadda D, Li X, Laeyendecker O, Kiwanuka N, Kigozi G,  
609 Kiddugavu M, Lutalo T (2005) Rates of HIV-1 transmission per coital act, by stage of HIV-1 infection, in  
610 Rakai, Uganda. *Journal of Infectious Diseases* **191**: 1403-1409

611  
612 Westendorp MO, Frank R, Ochsenbauer C, Stricker K (1995a) Sensitization of T cells to CD95-mediated  
613 apoptosis by HIV-1 Tat and gp120. *Nature* **375**: 497

614  
615 Westendorp MO, Shatrov VA, Schulze-Osthoff K, Frank R, Kraft M, Los M, Krammer PH, Droge W,  
616 Lehmann V (1995b) HIV-1 Tat potentiates TNF-induced NF-kappa B activation and cytotoxicity by  
617 altering the cellular redox state. *EMBO J* **14**: 546-554

618  
619 Wodarz D, Levy DN (2007) Human immunodeficiency virus evolution towards reduced replicative fitness  
620 in vivo and the development of AIDS. *Proc Biol Sci* **274**: 2481-2490

621  
622 Wu Y, Beddall MH, Marsh JW (2007) Rev-dependent indicator T cell line. *Current HIV research* **5**: 394-402

623  
624 Zeng M, Haase AT, Schacker TW (2012) Lymphoid tissue structure and HIV-1 infection: life or death for T  
625 cells. *Trends in immunology* **33**: 306-314

626  
627 Zhong P, Agosto LM, Ilnskaya A, Dorjbal B, Truong R, Derse D, Uchil PD, Heidecker G, Mothes W (2013)  
628 Cell-to-cell transmission can overcome multiple donor and target cell barriers imposed on cell-free HIV.  
629 *PLoS One* **8**: e53138

630  
631

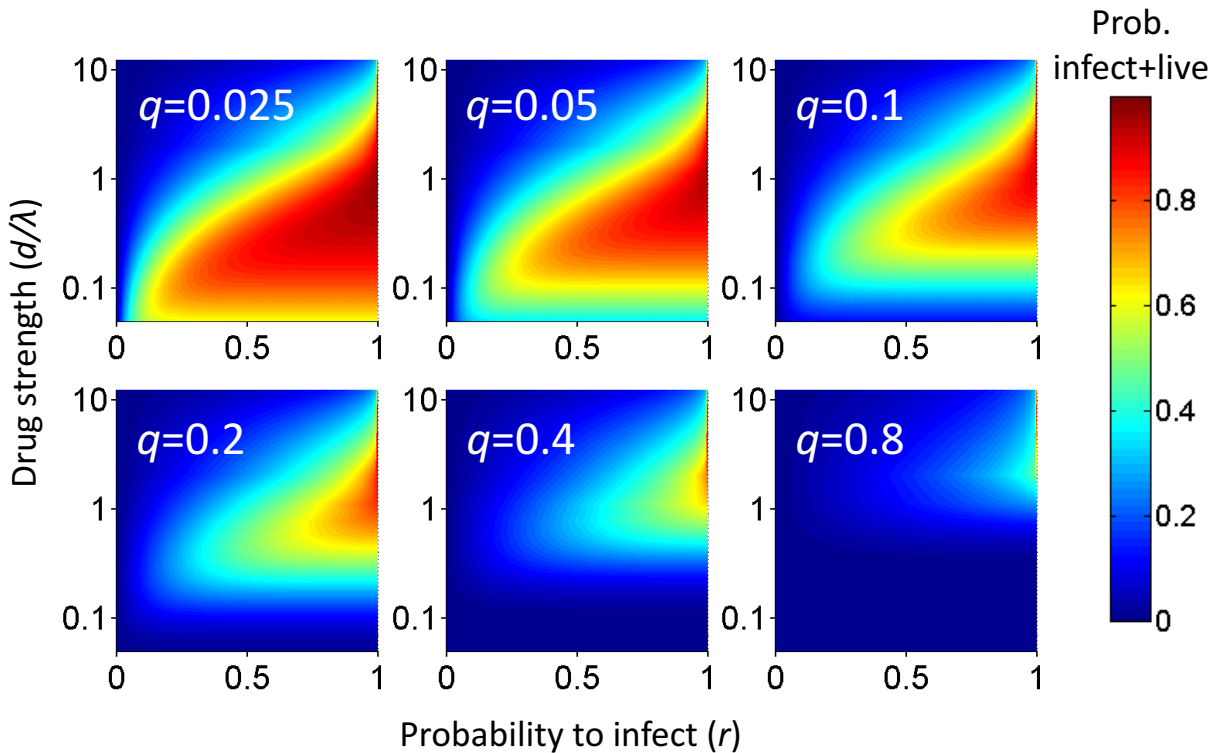

**Figure 1. Probability for a cell to be infected and live as a function of inhibitor.** Probability for a cell to be infected and live was calculated for 20 infection attempts ( $\lambda$ ) and represented as a heat map. Drug strength as  $d/\lambda$  is on the y-axis, and the probability per virion to infect ( $r$ ) is on the x-axis. Each plot is the calculation for one value of the probability per virus to die ( $q$ ) denoted in white in the top left corner.

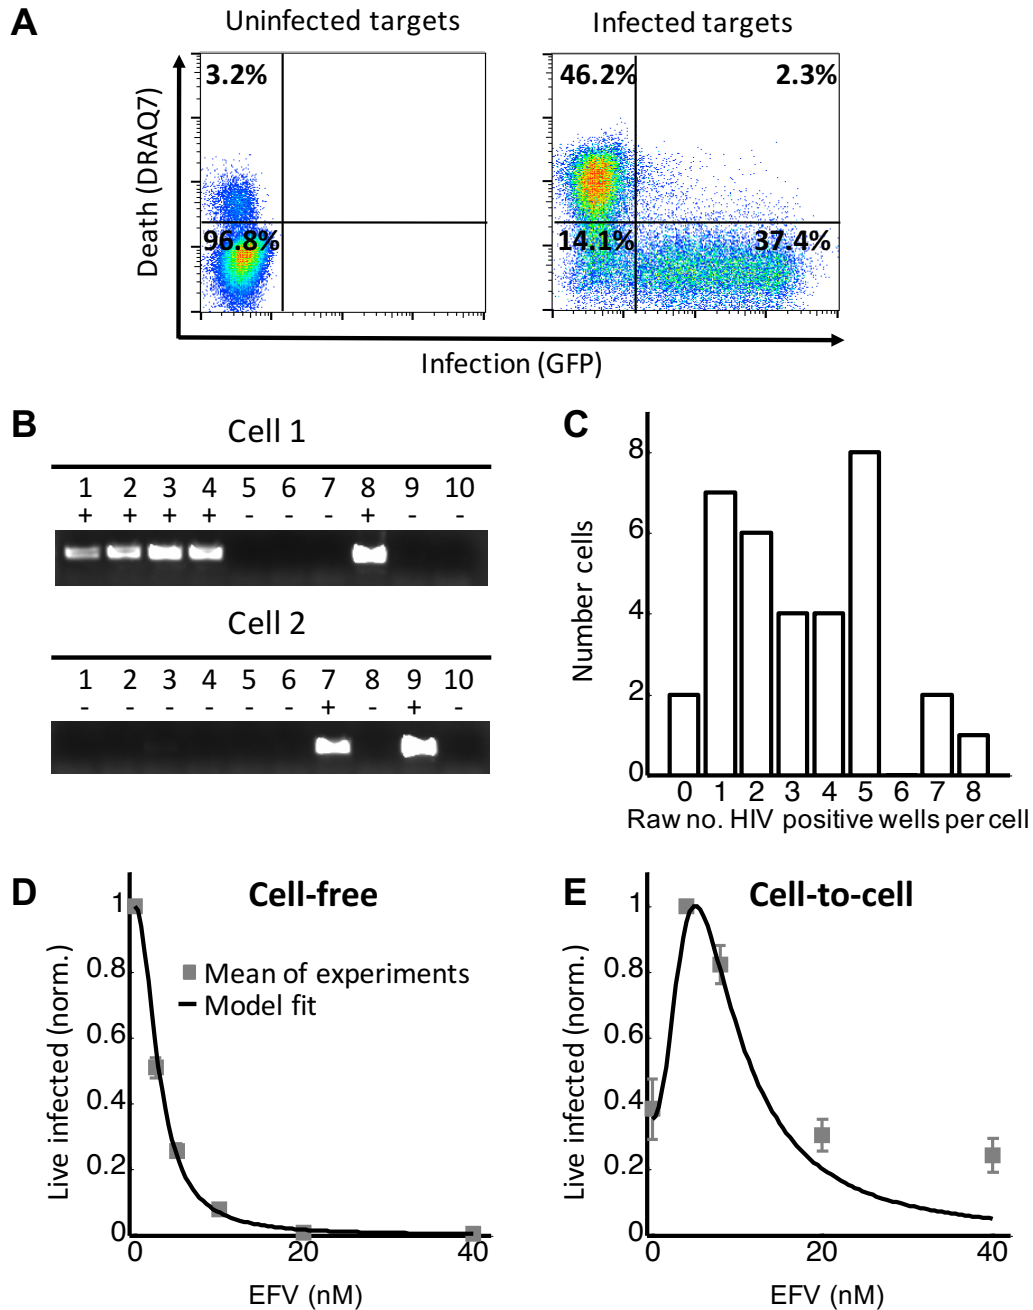

**Figure 2. Partial inhibition of HIV in coculture infection increases the number of live infected cells.** (A) Experimental system to detect live infected cells by flow cytometry. Left plot shows uninfected E7 reporter cells, and right plot shows E7 cells after 2 days of infection. Infected cells are detected by HIV dependent GFP reporter expression (x-axis), while dead cells as detected by the intracellular presence of the death indicator dye DRAQ7 (y-axis). Live infected cells are in the bottom right quadrant.

(B) To quantify HIV DNA copy number per cell, GFP positive cells were sorted into individual wells of a multi-well plate at 1 cell per well and lysed. Each lysed cell was further subdivided into 10 wells and nested PCR performed to detect whether the well contained a copy of HIV DNA. The sum of PCR positive wells for a given cell was used as the raw HIV DNA copy number for that cell.

(C) Histogram of the raw number of detected HIV DNA copies per cell. Results are of 34 cells from 3 independent experiments ( $n=4$  for experiment 1,  $n=20$  for experiment 2,  $n=10$  for experiment 3).

(D) The number of live infected cells normalized by the maximum number of live infected cells in cell-free infection as a function of EFV. Black line represents best-fit model for EFV suppression of single virion infection, with  $IC_{50}=2.9\text{nM}$  and Hill coefficient of 2.1. Shown are means and standard errors for 3 independent experiments, with a minimum of 50,000 cells collected per data point per experiment by flow cytometry.

(E) The number of live infected cells normalized by the maximum number of live infected cells in coculture infection as a function of EFV. Black line represents best-fit model for the effect of EFV on infection with multiple virions according to Equation (2), with drug strength ( $d$ ) values calculated based on the cell-free infection data. The fits recapitulated the experimental results when  $r=0.4$  and  $q=0.11$ . Shown are means and standard errors for 3 independent experiments, with a minimum of 50,000 cells collected per data point per experiment by flow cytometry.

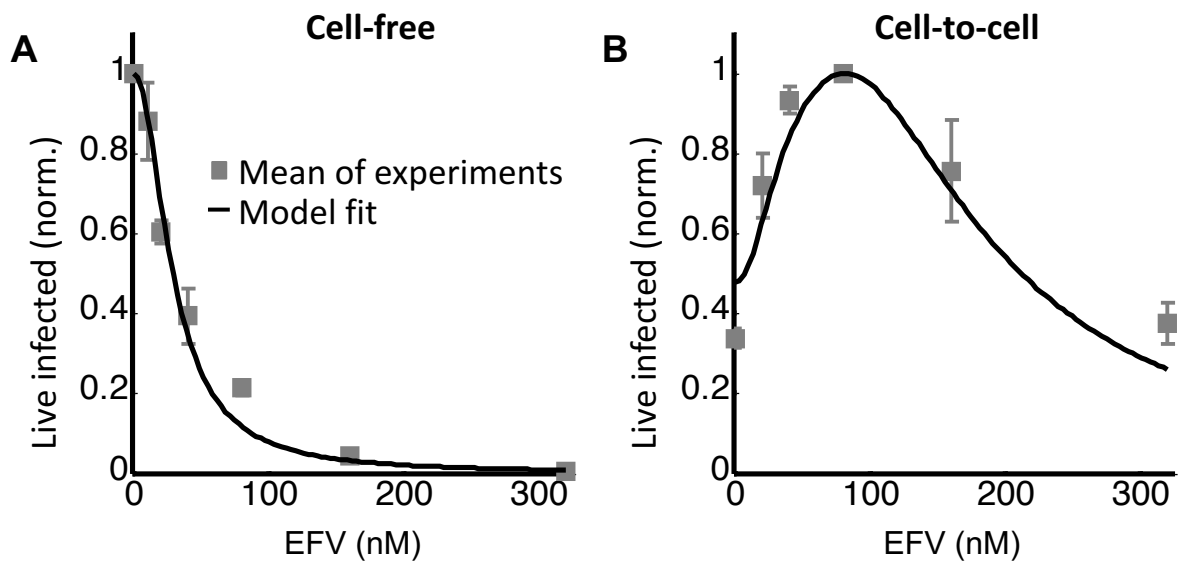

**Figure 3. Partial inhibition of the EFV resistant L100I mutant shifts the peak of live infected cells to higher EFV concentrations.** (A) The number of live infected cells normalized by the maximum number of live infected cells in cell-free infection as a function of EFV for the L100I mutant. Black line represents best-fit model for EFV suppression of single virion infection, with  $IC_{50}=29\text{nM}$  and Hill coefficient of 2.0. Shown are means and standard errors for 3 independent experiments, with a minimum of 50,000 cells collected per data point per experiment by flow cytometry. (B) The number of live infected cells normalized by the maximum number of live infected cells in coculture infection by the L100I mutant as a function of EFV. Black line represents best-fit model for the effect of EFV on infection with multiple virions according to Equation (2), with  $d$  values calculated based on the cell-free infection data for the L100I mutant. The fits recapitulated the experimental results when  $r=0.9$  and  $q=0.06$ . Shown are means and standard errors for 3 independent experiments, with a minimum of 50,000 cells collected per data point per experiment by flow cytometry.

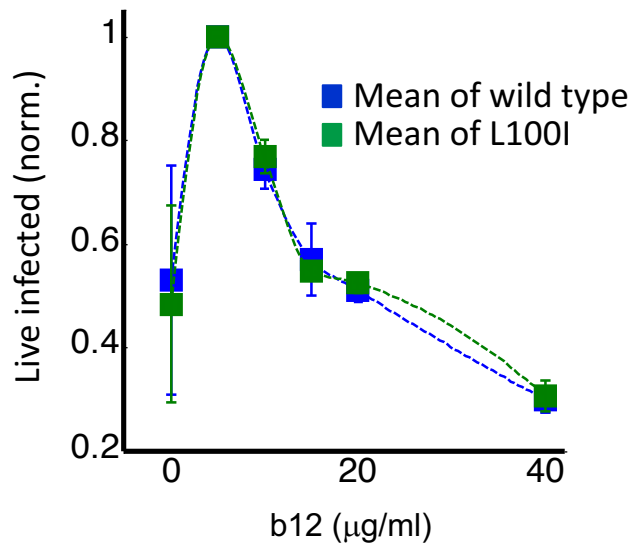

**Figure 4. Partial inhibition of coculture infection with neutralizing antibody results in higher numbers of live infected cells.** Shown are the numbers of live infected cells normalized by the maximum number of live infected cells in coculture infection as a function of b12 antibody concentration. Infection was by either EFV sensitive HIV (blue) or the L100I EFV resistant mutant (green). Dotted lines are a guide to the eye. Shown are means and standard errors for 3 independent experiments, with a minimum of 50,000 cells collected per data point per experiment by flow cytometry.



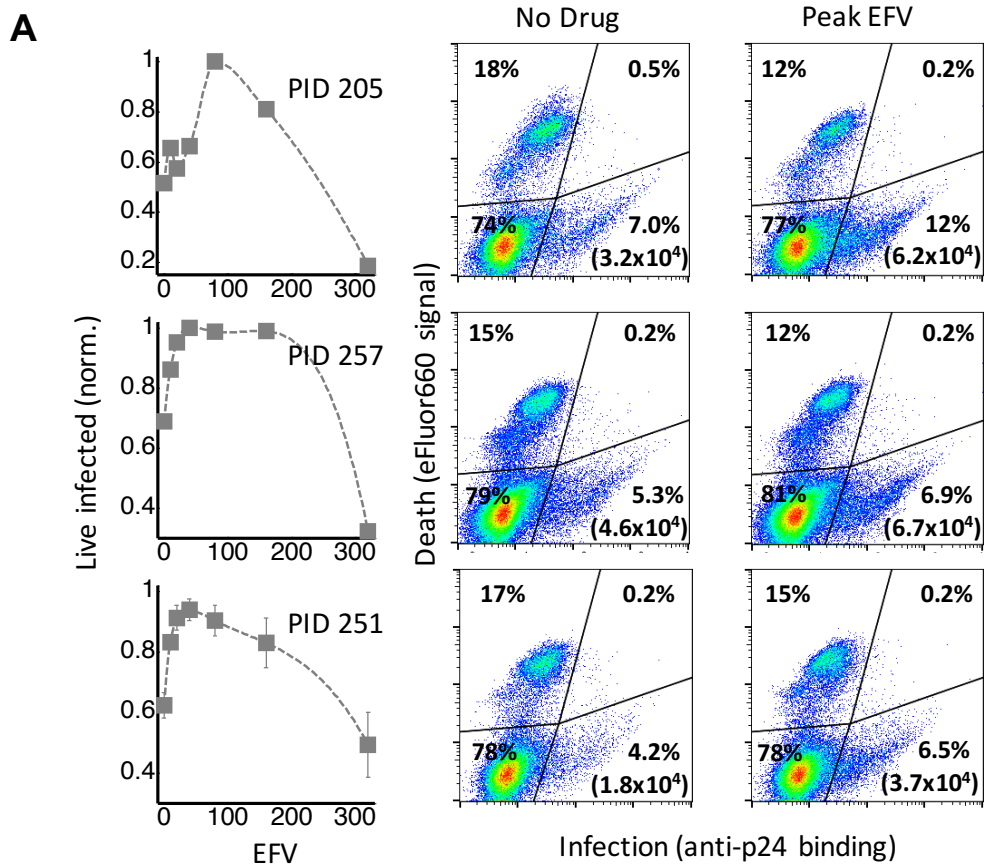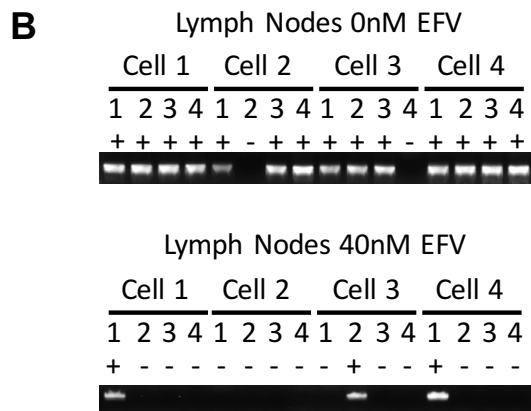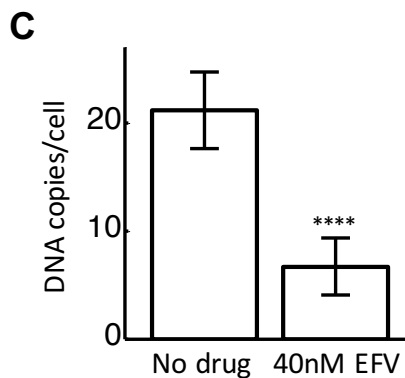

**Figure 5. Infection optimum with partial inhibition by EFV in lymph node cells.** (A) The number of live infected cells as a function of EFV. Each row represents *in vitro* infection of lymph node cells from one participant designated by a participant identification number (PID). Left column is the number of live infected cells normalized by the maximum number of live infected cells in coculture infection as a function of EFV. Middle and right columns are flow cytometry dot plots

showing infection in the absence of drug and at the infection optimum, with HIV p24 on the x-axis and death as detected by the dye eFluor660 on the y-axis. Infected live cells are in the bottom right quadrant. The percent of cells in each quadrant is shown, and number in brackets represents the density of live infected cells per ml. There were sufficient cells for single experiments for lymph nodes from PID 205 and 257. Means and standard errors for 3 independent experiments are shown for the lymph node from PID 251. Dotted lines are a guide to the eye. (B) HIV DNA copy number per cell was quantified by sorting fixed p24 positive lymph node cells from PID 251 into individual wells of a multi-well plate at 1 cell per well. Cells were lysed and de-crosslinking performed. Each cell lysate was further divided into 4 wells and nested PCR performed to detect HIV DNA. First row is representative of the number of positive wells per cell for cells in the absence of drug. Second row is representative of the number of positive wells per cell for cells in the presence of 40nM EFV. (C) Quantified number of HIV DNA copies in the absence of drug and presence of 40nM EFV after correction for assay sensitivity. Results are of 56 cells from 3 independent experiments for each drug condition (n=8 for experiment 1, n=24 for experiment 2, n=24 for experiment 3). \*\*\*\*p=4x10<sup>-9</sup> by 2 tailed t-test.

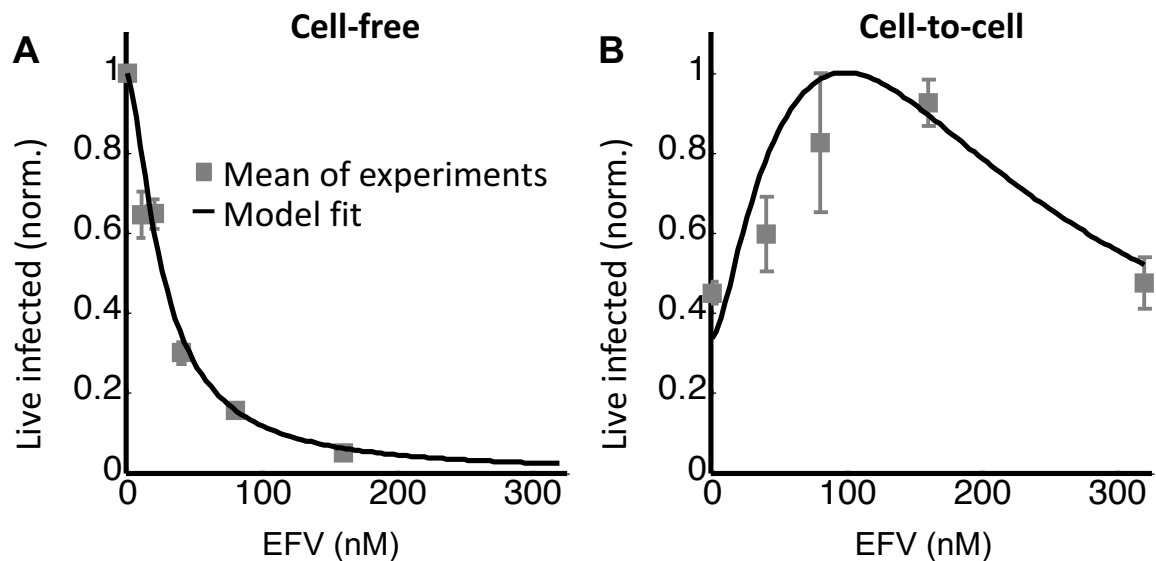

**Figure 6. Infection with the K103N mutant shows an infection optimum at clinically observed lymph node EFV concentrations.** (A) The number of live infected cells normalized by the maximum number of live infected cells in cell-free infection as a function of EFV for the K103N mutant. Black line represents best-fit model for the effect of EFV on infection with single virions, with  $IC_{50}=26\text{nM}$  and Hill coefficient of 1.5. Shown are means and standard errors for 2 independent experiments using cells from PID 251. (B) The number of live infected cells normalized by the maximum number of live infected cells in coculture infection as a function of EFV for the K103N mutant. Black line represents best-fit model for the effect of EFV on infection with multiple virions according to Equation (2), with  $d$  values calculated based on the cell-free infection data for the K103N mutant and the mean number of integrations in the absence of drug determined for L100I. The fits recapitulated the experimental results when  $r = 0.7$  and  $q = 0.06$ . Shown are means and standard errors for 3 independent experiments, There were sufficient lymph node cells from PID 251 for 2 of the 3 experiments, and the third experiment was performed with lymph node cells from PID 274.

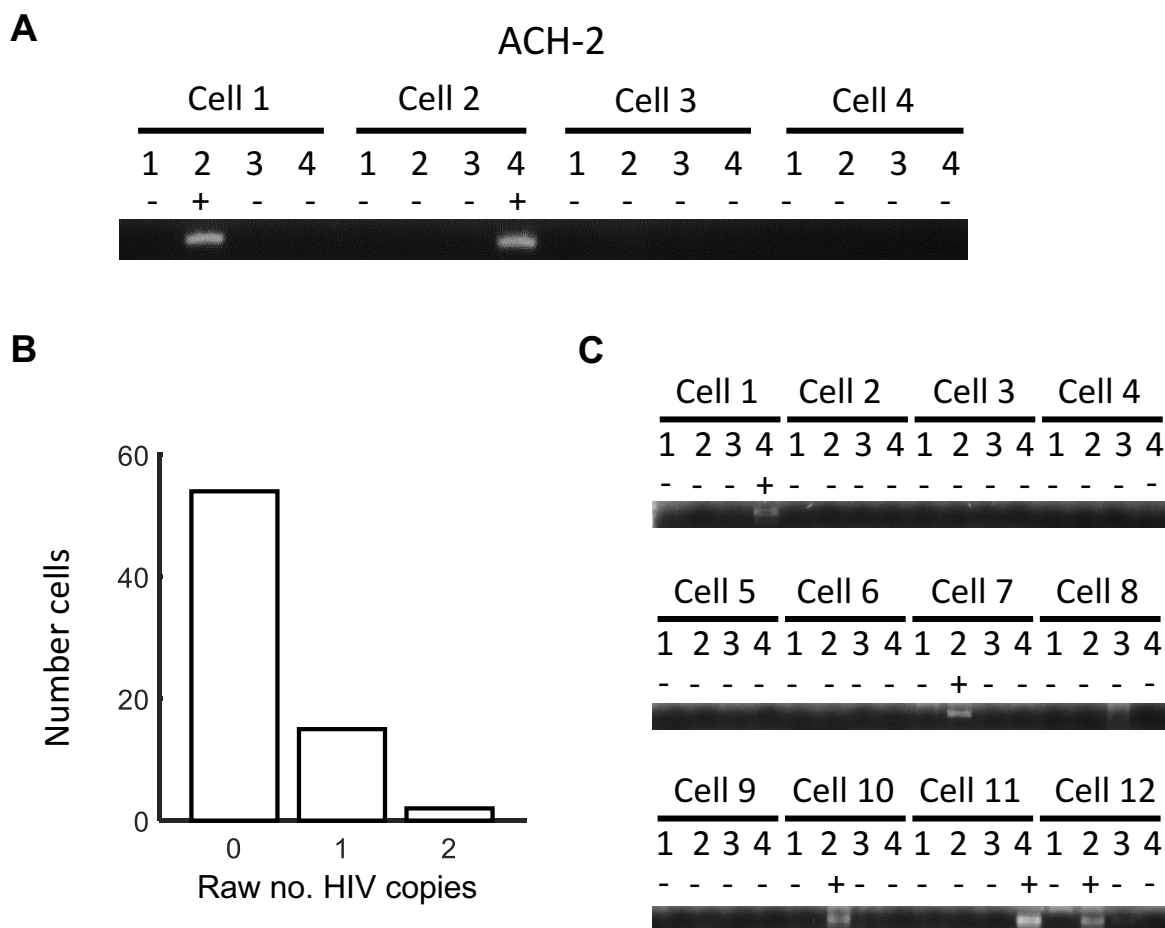

**Figure 2 – Figure supplement 1. Detected integrations in ACH-2 cells and cells infected with cell-free virus.** (A) To quantify HIV DNA copy number per cell in ACH-2 cells which contain single inactive integrations of HIV, cells were sorted into individual wells of a multi-well plate at 1 cell per well and lysed. Each lysed cell was further divided into 4 wells and nested PCR performed to on a region of the reverse transcriptase gene to detect whether the well contained a copy of HIV DNA. A total of 72 cells were tested in 3 independent experiments, 24 cells per experiment. (B) Histogram of the number of HIV DNA copies per cell. (C) GFP positive E7 cells infected with cell-free virus at an infection frequency of approximately 0.1 were sorted into individual wells of a multi-well plate at 1 cell per well and lysed. Each lysed cell was further divided into 4 wells and nested PCR performed. One experiment was performed, and the first 12 out of 17 cells assayed are shown.

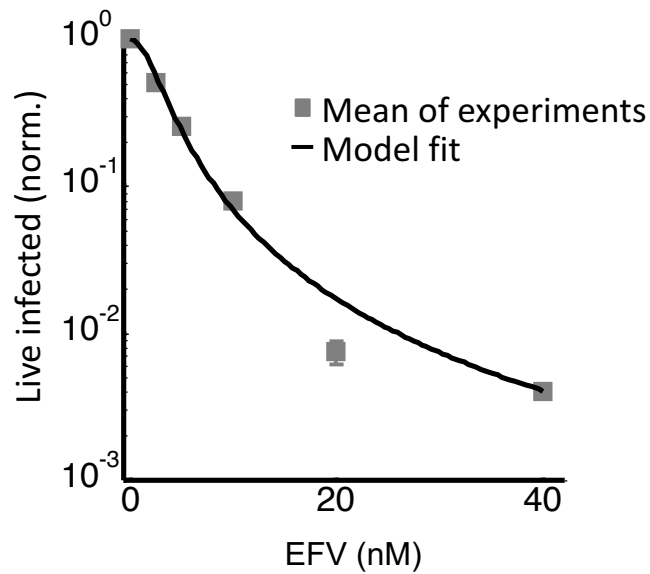

**Figure 2 – Figure supplement 2. The number of live infected cells in cell-free infection with wild type HIV.** Live infected cells are normalized by the maximum number of live infected cells in cell-free infection as a function of EFV. Black line represents best-fit model for the effect of EFV on infection with single virions, with  $IC_{50}=2.4\text{nM}$  and Hill coefficient of 1.8. Shown are means and standard errors for 3 independent experiments. Y-axis shown on a log scale to better view fits at low live infected cell numbers.

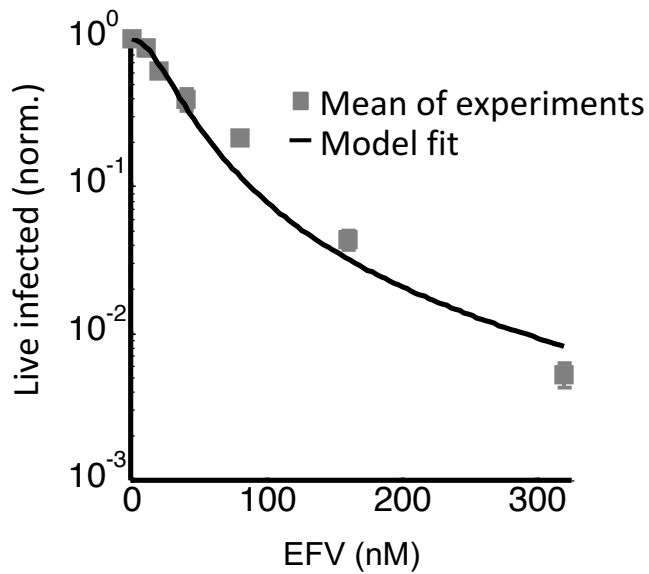

**Figure 3 – Figure supplement 1. The number of live infected cells in cell-free infection with the L100I mutant.** Live infected cells are normalized by the maximum number of live infected cells in cell-free infection as a function of EFV. Black line represents best-fit model for the effect of EFV on infection with single virions, with  $IC_{50}=26.5\text{nM}$  and Hill coefficient of 2.0. Shown are means and standard errors for 3 independent experiments.

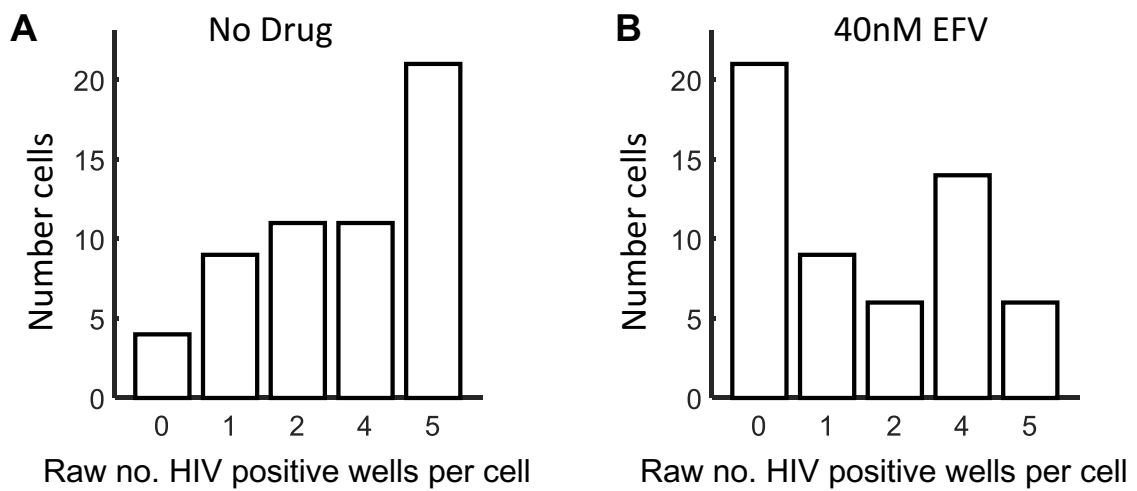

**Figure 5 – Figure supplement 1. Raw HIV DNA copy numbers per lymph node cell.** Fixed, p24 positive cells from PID 251 were sorted into individual wells of a multi-well plate at 1 cell per well and lysed. Each lysed cell was further divided into 4 wells and nested PCR performed on a region of the reverse transcriptase gene. Shown are histograms of the raw numbers of positive wells per cell. (A) No drug. (B) 40nM EFV. Results are from 3 independent experiments.

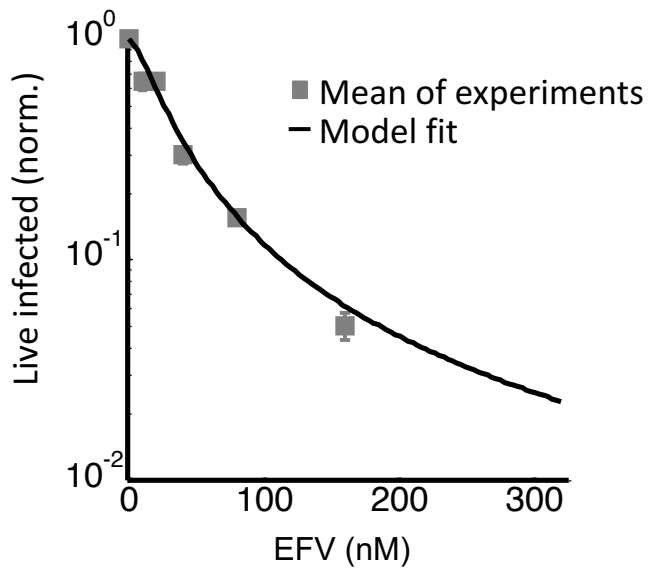

**Figure 6 – Figure supplement 1. The number of live infected cells in cell-free infection with the K103N mutant.** Live infected cells are normalized by the maximum number of live infected cells in cell-free infection as a function of EFV. Black line represents best-fit model for the effect of EFV on infection with single virions, with  $IC_{50}=26.0$ nM and Hill coefficient of 1.5. Shown are means and standard errors for 3 independent experiments.



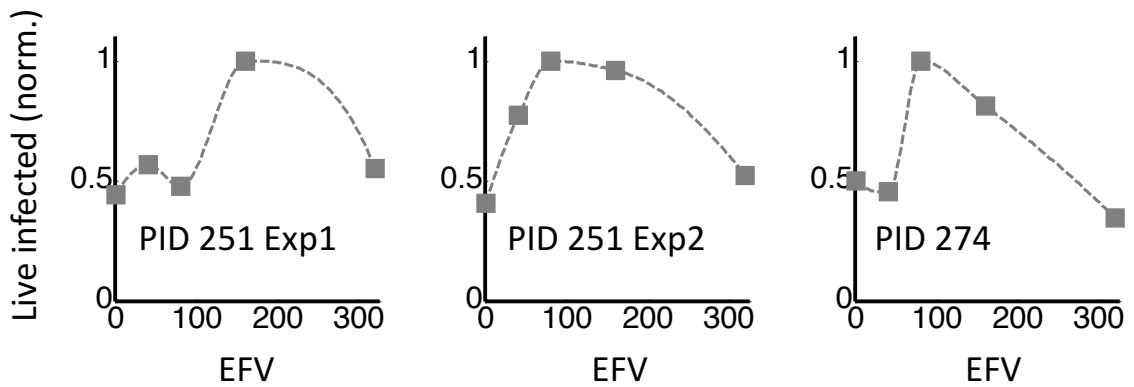

**Figure 6 – Figure supplement 2. Response of K103N coculture infection to EFV in individual experiments.** Shown is the number of live infected cells normalized by the maximum number of live infected cells in coculture infection as a function of EFV for the patient designated by the three digit identifier appearing below the curve. Two experiments per performed for lymph nodes resected from PID 251, and one for PID 274. Dotted lines are a guide to the eye.

**S Table 1: Participant information**

| <b>Participant ID</b> | <b>Sex</b> | <b>Age (years)</b> | <b>LN location</b> |
|-----------------------|------------|--------------------|--------------------|
| 205                   | F          | 27                 | Supraclavicular    |
| 251                   | M          | 32                 | Mediastinal        |
| 257                   | F          | 46                 | Peribronchial      |
| 274                   | M          | 22                 | Peribronchial      |
